# Supplementary material
Source: publisher figshare collection journal article supplement (https://brill.figshare.com/ndownloader/files/40208230)
Supplement: Supplementary file 1 [file 40208230]

## Sheet: Table S2
River System	Population	No.	Lat	Long	P. lessonae	Hybrids	P. ridinundus	n
Tizsa	Petrovo	1	48.077	22.923			20	20
Tizsa	Hust	2	48.1839	23.257			20	20
Tizsa	Serednye	3	48.5288	22.4937			20	20
Prut River	Stanovtsi	4	48.0843	26.0853			20	20
Prut River	Novoselitsa	5	48.2024	26.2825			20	20
Prut River	Kuty	6	48.2704	25.2061			20	20
Prut River	Chernovtsy	7	48.2745	25.916			20	20
Prut River	Redkovtsy	8	48.3225	26.0875			20	20
Prut River	Lugani	9	48.3423	25.8248			20	20
Prut River	Schipincy	10	48.3873	25.7293			20	20
Prut River	Orchovchy	11	48.4119	25.6146			20	20
Prut River	Snyatin	12	48.4443	25.5483			20	20
Prut River	Zamulinchi	13	48.486	25.1814			20	20
Prut River	Pereriv	14	48.495	25.1333			20	20
Prut River	Kolomyia	15	48.5314	25.0026			20	20
Prut River	Lanchyn	16	48.5512	24.7589			20	20
Lower Danube	Vilkove-1	17	45.2446	29.7083		2	25	27
Lower Danube	Viklove-2	18	45.3034	29.7514		1	24	25
Lower Danube	Vilkove-2	19	45.3202	29.7654	13	12	41	66
Lower Danube	Viklove-3	20	45.3386	29.655	2		43	45
Lower Danube	Vilkove-3	21	45.3444	29.6637		1	19	20
Lower Danube	Viklove-4	22	45.346	29.723		8	25	33
Lower Danube	Vilkove-4	23	45.4	29.6		70	151	221
Lower Danube	Lesky-1	24	45.4496	29.4616		2	15	17
Lower Danube	Lesky-2	25	45.4499	29.441			20	20
Lower Danube	Kiliia	26	45.4893	29.1744			20	20
Upper Dniester	Krasny Okna	27	47.5535	29.4677			20	20
Upper Dniester	Stara Kulna	28	47.7374	29.3477			20	20
Upper Dniester	Lubomirka	29	47.7646	29.4852			20	20
Upper Dniester	Rybnytsia	30	47.7665	28.9841			20	20
Upper Dniester	Anan'yev	31	47.7698	29.908			20	20
Upper Dniester	Gonorata	32	47.7986	29.4614			20	20
Upper Dniester	Borshchi	33	47.8187	29.4942		5	15	20
Upper Dniester	Storoginets	34	48.1642	25.7087			20	20
Upper Dniester	Porogy	35	48.2339	28.3236			20	20
Upper Dniester	Mohyliv-Podilskyi	36	48.4439	27.7888			20	20
Upper Dniester	Kremenne	37	48.4728	27.5926			20	20
Upper Dniester	Rzschavyntsy	38	48.5071	26.006			20	20
Upper Dniester	Khotyn	39	48.5088	26.5125			20	20
Upper Dniester	Rashkiv	40	48.5151	26.2922			20	20
Upper Dniester	Ruhotyn	41	48.5248	26.2005			20	20
Upper Dniester	Ataky	42	48.5451	26.4727			20	20
Upper Dniester	Panevchy	43	48.575	26.3427			20	20
Upper Dniester	Melnitsa-Podilska	44	48.5974	26.1426			20	20
Upper Dniester	Myichaylivka	45	48.6016	26.2381			20	20
Upper Dniester	Bogdanivka	46	48.6133	25.9614			20	20
Upper Dniester	Zalishchyky	47	48.65	25.7467		2	15	17
Upper Dniester	Kamianets-Podilskyi	48	48.6746	26.5627			20	20
Upper Dniester	Shustovtsy	49	48.682	26.2447			20	20
Upper Dniester	Gorodnytsia	50	48.6855	25.6262			20	20
Upper Dniester	Luchynchyk	51	48.7026	27.7842			20	20
Upper Dniester	Chervonograd-1	52	48.7112	25.8559		8	20	28
Upper Dniester	Chervenograd-2	53	48.7117	25.8595			20	20
Upper Dniester	Ternava	54	48.7412	26.8273			20	20
Upper Dniester	Katiuzhany	55	48.7668	27.703			20	20
Upper Dniester	Ustechko	56	48.7781	25.585			20	20
Upper Dniester	Tribuchivka	57	48.7826	26.9139			20	20
Upper Dniester	Makiv	58	48.7949	26.6505		5	20	25
Upper Dniester	Nyirkiv	59	48.8044	25.5862	1	5	15	21
Upper Dniester	Slobodka-Mushkayvska-1	60	48.809	26.1009			20	20
Upper Dniester	Nezhyn	61	48.8345	26.5605			20	20
Upper Dniester	Skala Podilska	62	48.8543	26.2032			20	20
Upper Dniester	Slobidka-Mushkativska-2	63	48.86	25.94		9	20	29
Upper Dniester	Muchayvka	64	48.8978	25.7315			20	20
Upper Dniester	Letava	65	48.9063	26.3332			20	20
Upper Dniester	Svarychyv	66	48.96	24.1758			20	20
Upper Dniester	Dolyna	67	48.9765	23.9851			20	20
Upper Dniester	Gusaty -2	68	49.0701	26.2031			20	20
Upper Dniester	Monastyryska-1	69	49.09	25.18			20	20
Upper Dniester	Monastyryska-2	70	49.09	25.18	3	9	10	22
Upper Dniester	Kupyn	71	49.1016	26.5823			20	20
Upper Dniester	Perevoloka	72	49.1128	25.3533			20	20
Upper Dniester	Sinevidne	73	49.1136	23.574			20	20
Upper Dniester	Galych	74	49.126	24.7392			20	20
Upper Dniester	Zalukva	75	49.1295	24.7222			20	20
Upper Dniester	Voynyliv	76	49.1324	24.4838			20	20
Upper Dniester	Lisovychy	77	49.1359	23.9133			20	20
Upper Dniester	Gorne	78	49.174	23.7404			20	20
Upper Dniester	Dovge	79	49.18	23.87			20	20
Upper Dniester	Dolyna	80	49.2152	25.737			20	20
Upper Dniester	Krutiliv	81	49.2332	26.2066			20	20
Upper Dniester	Stryi	82	49.2411	23.852			20	20
Upper Dniester	Burschtyn	83	49.2668	24.6473			20	20
Upper Dniester	Truscavets	84	49.2692	23.5141			20	20
Upper Dniester	Podgaytsi	85	49.2787	25.1552			20	20
Upper Dniester	Neguchov	86	49.2911	23.795			20	20
Upper Dniester	Sokolov	87	49.3165	25.3735			20	20
Upper Dniester	Ostapie	88	49.3767	26.0405			20	20
Upper Dniester	Mykulyntsi	89	49.3984	25.6129			20	20
Upper Dniester	Rogatyn	90	49.4107	24.6007			20	20
Upper Dniester	Rozdil	91	49.4479	24.0848			20	20
Upper Dniester	Kochanivka	92	49.4637	26.1338			20	20
Upper Dniester	Novyi Rozdil	93	49.4662	24.1236			20	20
Upper Dniester	Plotycha	94	49.4933	25.2997			20	20
Upper Dniester	Rozvadiv	95	49.4956	23.964			20	20
Upper Dniester	Samby	96	49.5136	23.194			20	20
Upper Dniester	Mosty	97	49.5427	23.647			20	20
Upper Dniester	Mykolaiv	98	49.5514	23.9235			20	20
Upper Dniester	Ternopil -1	99	49.5517	25.5743			20	20
Upper Dniester	Ternopil -2	100	49.5708	25.5651			20	20
Upper Dniester	Ternopil -3	101	49.5754	25.5694			20	20
Upper Dniester	Ternopil -4	102	49.5832	25.5563			20	20
Upper Dniester	Bruchovychy	103	49.5834	24.5908			20	20
Upper Dniester	Komarno	104	49.6173	23.6783			20	20
Upper Dniester	Ozernaia	105	49.6238	25.3395			20	20
Upper Dniester	Svyrzh	106	49.6469	24.4261			20	20
Upper Dniester	Gladky	107	49.6562	25.4972			20	20
Upper Dniester	Truchevychy	108	49.6578	22.7964			20	20
Upper Dniester	Peremyishhliany	109	49.6819	24.5602			20	20
Upper Dniester	SudovaVyshnia	110	49.7916	23.362			20	20
Upper Dniester	Zaliztsy	111	49.794	25.373			20	20
Upper Dniester	Zolochiv	112	49.8195	24.8898			20	20
Upper Dniester	Peniaky	113	49.8904	25.1981			20	20
Upper Dniester	Onatskovtsy	114	49.9497	27.4871			20	20
Upper Dniester	Novolabun	115	50.0022	27.3503			20	20
Lower Dniester	Sarata	116	46.0238	29.6717			20	20
Lower Dniester	Bilgorod Dnistrovskyi	117	46.1962	30.3607			20	20
Lower Dniester	Suholuzhie	118	46.2208	30.2812			20	20
Lower Dniester	Ovidiopil	119	46.2444	30.4366			20	20
Lower Dniester	Mykolayvka	120	46.2762	30.3695			20	20
Lower Dniester	Krasna Kosa	121	46.3304	30.1012			20	20
Lower Dniester	Udobnoye-1	122	46.3612	30.0891			20	20
Lower Dniester	Nadlimanske	123	46.3639	30.2914			20	20
Lower Dniester	Mayaky-1	124	46.3687	30.2453			20	20
Lower Dniester	Nadlimanske	125	46.3713	30.3217			20	20
Lower Dniester	Udobne-2	126	46.3726	30.0978			20	20
Lower Dniester	Mayaky-2	127	46.3807	30.2707			20	20
Lower Dniester	Mayaky-3	128	46.3951	30.2528			20	20
Lower Dniester	Mayaky-4	129	46.3985	30.2673			20	20
Lower Dniester	Mayaky-5	130	46.4042	30.2613			20	20
Lower Dniester	Mayaky-4	131	46.4063	30.2419		3	25	28
Lower Dniester	Mayaky-5	132	46.4077	30.2574		10	5	15
Lower Dniester	Mayaky-6	133	46.41	30.2618			20	20
Lower Dniester	Palanka-1	134	46.4127	30.1298			20	20
Lower Dniester	Mayaky-7	135	46.4216	30.2521			20	20
Lower Dniester	Palanka-2	136	46.426	30.1725			20	20
Lower Dniester	Bilyayvka-1	137	46.4476	30.1825		10	18	28
Lower Dniester	Bilyayvka-2	138	46.4543	30.1858			20	20
Lower Dniester	Bilyayvka-3	139	46.4746	30.1917			20	20
Lower Dniester	Yasky-1	140	46.4845	30.1533			20	20
Lower Dniester	Yasky-2	141	46.5069	30.1344			20	20
Lower Dniester	Yasky-3	142	46.5158	30.0706			20	20
Lower Dniester	Yasky-4	143	46.5185	30.1077			20	20
Lower Dniester	Yasky-5	144	46.5285	30.0609			20	20
Lower Dniester	Troitcke-1	145	46.5461	30.0013			20	20
Lower Dniester	Troitcke-2	146	46.5548	29.9872			20	20
Pripyat River	Shchybena	147	49.7537	26.2981			20	20
Pripyat River	Barsuky	148	49.891	25.9735			20	20
Pripyat River	Komaryn	149	49.9781	25.5956			20	20
Pripyat River	Dunayiv	150	50.0481	25.6066			20	20
Pripyat River	Brody	151	50.0888	25.1278			20	20
Pripyat River	Poliss'ke	152	50.1002	26.5867			20	20
Pripyat River	Radyviliv	153	50.1278	25.2418			20	20
Pripyat River	Ikva	154	50.1292	25.666			20	20
Pripyat River	Belokrynytsia	155	50.1458	25.707			20	20
Pripyat River	Plotnychna	156	50.1476	24.6313			20	20
Pripyat River	Surazh	157	50.1494	26.1724			20	20
Pripyat River	Zalestsy	158	50.1568	26.0031			20	20
Pripyat River	Schepetivka	159	50.1666	27.0643			20	20
Pripyat River	Stanislavchyk	160	50.1746	24.9037			20	20
Pripyat River	Slavuta	161	50.2991	26.8673			20	20
Pripyat River	Ostrog	162	50.3062	26.553			20	20
Pripyat River	Bugany	163	50.3487	24.8246			20	20
Pripyat River	Peremyl	164	50.3953	25.1047			20	20
Pripyat River	Krasnostav	165	50.3997	27.1878			20	20
Pripyat River	Dubno	166	50.4147	25.748			20	20
Pripyat River	Mirogoscha	167	50.4253	25.8617			20	20
Pripyat River	Varkovychy	168	50.4684	25.966			20	20
Pripyat River	Zdolbuniv	169	50.5157	26.267			20	20
Pripyat River	Duliby	170	50.5454	26.7227			20	20
Pripyat River	Smilka	171	50.5747	27.6452			20	20
Pripyat River	Novograd-Volynskyi-1	172	50.5834	27.6208		1	18	19
Pripyat River	Rivne	173	50.5973	26.2457			20	20
Pripyat River	Volodar-Volynskyi	174	50.5976	28.4408	6			6
Pripyat River	Hoshcha	175	50.6	26.69			20	20
Pripyat River	Lutsk	176	50.7605	25.2321			20	20
Pripyat River	Otachiv	177	51.1915	30.4222			20	20
Pripyat River	Kovanka	178	51.3875	28.0954			20	20
Pripyat River	Didovo	179	51.3897	28.0265			20	20
Pripyat River	Perga	180	51.3995	27.8829			20	20
Pripyat River	Pripyat	181	51.4339	30.0642	37	16	4	57
Pripyat River	Selezivka-1	182	51.5018	28.1073	10	2		12
Pripyat River	Selezivka-2	183	51.5214	27.2778	20			20
Pripyat River	Selezivka-3	184	51.5316	28.1034	15	2		17
Pripyat River	Selezivka-4	185	51.535	28.1214	20			20
Pripyat River	Selezivka-5	186	51.535	28.1444	20			20
Pripyat River	Selezivka-6	187	51.535	28.1071	11	17		28
Pripyat River	Selezivka-7	188	51.5351	28.1112	20			20
Pripyat River	Selezivka-8	189	51.5375	28.0661	20			20
Pripyat River	Selezivka-9	190	51.5378	28.1539	20			20
Pripyat River	Selezivka-10	191	51.543	28.1742	20			20
Pripyat River	Selezivka-11	192	51.5511	28.1946	20			20
Pripyat River	Selezivka-12	193	51.5588	28.1534	20			20
Pripyat River	Selezivka-13	194	51.5817	28.1303	20			20
Pripyat River	Budimlia	195	51.6844	27.0709	20			20
Pripyat River	Pidkormillya	196	51.8316	25.528	20			20
Desna River	Mezyn	197	51.8275	33.0805			20	20
Desna River	Sverdlovka	198	51.7976	33.0698			20	20
Desna River	Slout	199	51.7526	33.7751			20	20
Desna River	Oboloniye	200	51.6172	32.9202			20	20
Desna River	Kleven	201	51.4338	33.8037			20	20
Desna River	Kolichivka	202	51.4252	31.3072	15	2		17
Desna River	Strelniki	203	51.4234	33.8486			20	20
Desna River	Blistova	204	51.4099	31.9173			20	20
Desna River	Berezivka	205	51.4017	32.1392	10	5	2	17
Desna River	Baturyin	206	51.3387	32.9093			20	20
Desna River	Spadshchyna	207	51.337	33.7383			20	20
Desna River	Putivl	208	51.3215	33.8821			20	20
Desna River	Otrohy-1	209	51.1735	30.8117	10	5		15
Desna River	Otrohy-2	210	51.0992	30.8258	20	2		22
Desna River	Migalivka	211	51.0401	31.8769		10	2	12
Desna River	Karpylivka	212	50.9813	30.7969	5	7	3	15
Desna River	Dolyna	213	50.9627	33.9791			20	20
Desna River	Oster	214	50.9547	30.8304	10	5	3	18
Desna River	Krehayiv	215	50.8153	30.7346	10	2		12
Desna River	Zhukyn	216	50.7852	30.6877		5	15	20
Desna River	Litochky-1	217	50.7848	30.7387	15	3		18
Desna River	Litochky-2	218	50.7648	30.7217	10	5		15
Desna River	Litochky-3	219	50.7518	30.7331	20	2		22
Desna River	Litochky-4	220	50.7499	30.6939		3	10	13
Desna River	Ruzhivka	221	50.6122	30.7491		5	10	15
Desna River	Zazimya-1	222	50.5817	30.6681		5	10	15
Desna River	Hotyanivka	223	50.572	30.5912		5	10	15
Desna River	Zazimya-2	224	50.5673	30.6931	9	4	22	35
Desna River	Oseshchyna-1	225	50.5656	30.5155		2	15	17
Desna River	Pogreby	226	50.5654	30.6096		2	10	12
Desna River	Oseshchyna-2	227	50.5566	30.5546		3	15	18
Upper Dnieper	Voropayivka	228	51.0197	30.3232			20	20
Upper Dnieper	Bilyi Berig	229	50.9775	30.0059			20	20
Upper Dnieper	Ivankiv	230	50.9433	29.9642			20	20
Upper Dnieper	Vachivka	231	50.9399	29.9274			20	20
Upper Dnieper	Kolentsy	232	50.9352	30.0845			20	20
Upper Dnieper	Tolokun	233	50.8854	30.4061			20	20
Upper Dnieper	Blidcha-1	234	50.8844	29.8728			20	20
Upper Dnieper	Blidcha-2	235	50.8496	29.199			20	20
Upper Dnieper	Blidcha-3	236	50.8384	29.7974			20	20
Upper Dnieper	Makariv	237	50.8098	29.6019			20	20
Upper Dnieper	Glibivka	238	50.7997	30.3584			20	20
Upper Dnieper	Kalita-1	239	50.7692	31.0615	20			20
Upper Dnieper	Sytnyaky	240	50.7638	29.753			20	20
Upper Dnieper	Kalita-2	241	50.7448	31.0816	10	2		12
Upper Dnieper	Zavorychy	242	50.7321	31.1707	20			20
Upper Dnieper	Gorodske	243	50.7294	29.3348			20	20
Upper Dnieper	Koziyivka	244	50.7058	29.5832			20	20
Upper Dnieper	Demidiv	245	50.7058	30.3251			20	20
Upper Dnieper	Moshchun-1	246	50.621	30.2824			20	20
Upper Dnieper	Zhytomyr	247	50.6179	29.5492			20	20
Upper Dnieper	Moshchun-2	248	50.5999	30.33			20	20
Upper Dnieper	Vyshgorod-1	249	50.5982	30.4959			20	20
Upper Dnieper	Vyshgorod-2	250	50.5765	30.4999			20	20
Upper Dnieper	Snigury	251	50.5759	29.5315			20	20
Upper Dnieper	Bucha	252	50.5559	30.283			20	20
Upper Dnieper	Kyiv (Izumrudne)	253	50.5303	30.5229			20	20
Upper Dnieper	Brovary	254	50.529	30.8629			20	20
Upper Dnieper	Irpin	255	50.5266	30.2751			20	20
Upper Dnieper	Kyiv (Kovpyto)	256	50.5248	30.672	10	5		15
Upper Dnieper	Kyiv (Bobrovnya)	257	50.5215	30.5432		1	5	6
Upper Dnieper	Kyiv (Kurenivka)	258	50.52	30.44			20	20
Upper Dnieper	Kyiv (Obolon)	259	50.5192	30.5221			20	20
Upper Dnieper	Mihaylivka-Rubezhivka	260	50.5181	30.1047		2	10	12
Upper Dnieper	Kyiv (Troenshchyna)	261	50.5131	30.5717			20	20
Upper Dnieper	Kyiv (Almazne)	262	50.508	30.6586			15	15
Upper Dnieper	Zgurivka-1	263	50.4989	31.7864	10	5	2	17
Upper Dnieper	Rusaniv	264	50.4948	31.1811			20	20
Upper Dnieper	Zgurivka-2	265	50.4906	31.7742	2	5	5	12
Upper Dnieper	Novobilichi	266	50.4892	30.314	77	55	149	281
Upper Dnieper	Kyiv (Voskresenka)	267	50.4844	30.5826			20	20
Upper Dnieper	Troyaniv	268	50.4764	29.2148			20	20
Upper Dnieper	Cherevki (Supoj)	269	50.4749	31.7734		5	20	25
Upper Dnieper	Kiev (Darnitsa)	270	50.4682	30.6056			20	20
Upper Dnieper	Stoyanka-1	271	50.4659	30.2401			20	20
Upper Dnieper	Kyiv (Syrets)	272	50.4644	30.422			20	20
Upper Dnieper	Kyiv (Nivka)-1	273	50.4632	30.2601		5	10	15
Upper Dnieper	Kyiv (Nivka)-2	274	50.4631	30.3254	5	5	10	20
Upper Dnieper	Kyiv (Bilychi)	275	50.4631	30.3254	78	40	17	135
Upper Dnieper	Kyiv (Truchanov)	276	50.4628	30.5394			20	20
Upper Dnieper	Kyiv (Berizka)	277	50.4626	30.6715		2	10	12
Upper Dnieper	Velyki Korovintsi	278	50.4561	29.8112			20	20
Upper Dnieper	Kyiv (Beresteyka)	279	50.45	30.42			43	43
Upper Dnieper	Stoyanka -2	280	50.4467	30.2322			20	20
Upper Dnieper	Kyiv (Svyatoshyn)	281	50.4437	30.3783			20	20
Upper Dnieper	Kyiv (Gydropark)	282	50.4388	30.5786			106	106
Upper Dnieper	Kiev (Otradnij)	283	50.4349	30.4248			40	40
Upper Dnieper	Kyiv (Harkiv district)	284	50.4214	30.6333			20	20
Upper Dnieper	Komsomolske	285	50.4191	29.727			20	20
Upper Dnieper	Shpitki	286	50.4154	30.1305			10	10
Upper Dnieper	Gnativka	287	50.4	30.22			40	40
Upper Dnieper	Kyiv (Orehovatske)	288	50.3964	30.5103			20	20
Upper Dnieper	Denyshy	289	50.3957	29.3028	2	5	5	12
Upper Dnieper	Bilogorodka	290	50.3904	30.2174			20	20
Upper Dnieper	Kiev (Prolesky)	291	50.3859	30.7547		2	3	5
Upper Dnieper	Kyiv (Golosievo)-1	292	50.375	30.5024			38	38
Upper Dnieper	Kyiv (Golosievo)-2	293	50.375	30.5026			20	20
Upper Dnieper	Pilyava	294	50.3722	29.166	20			20
Upper Dnieper	Pirozhky	295	50.3698	29.3237	20			20
Upper Dnieper	Kyiv (Bortnichy)	296	50.3642	30.6683			20	20
Upper Dnieper	Tsarivka	297	50.3612	29.2393	20			20
Upper Dnieper	Kryukovshchyna-1	298	50.3609	30.3775		2	10	12
Upper Dnieper	Kryukovshchyna-2	299	50.3591	30.3744			20	20
Upper Dnieper	Kocheriv	300	50.3586	29.1148	20			20
Upper Dnieper	Pirogovo	301	50.3556	30.5277			20	20
Upper Dnieper	Kyiv (Vodnykiv)	302	50.3497	30.5917			20	20
Upper Dnieper	Gatne	303	50.3465	30.3879			20	20
Upper Dnieper	Baryshyvka	304	50.3451	31.3402			20	20
Upper Dnieper	Bobrytsya	305	50.3444	30.1686			20	20
Upper Dnieper	Kyiv (Feofania)	306	50.3407	30.4914	4	52	187	243
Upper Dnieper	Kyiv (Feofania)	307	50.3362	30.4896		5	45	50
Upper Dnieper	Vita Pochtovaya	308	50.3307	30.3445	1	2	10	13
Upper Dnieper	Hotiv	309	50.3297	30.4784			20	20
Upper Dnieper	Kalnuchi-2	310	50.3234	30.6431		2	15	17
Upper Dnieper	Knyazhichy	311	50.3231	30.1353			20	20
Upper Dnieper	Kiev (Koncha)	312	50.3218	30.5793	20			20
Upper Dnieper	Kocheriv-1	313	50.3159	29.1015	20			20
Upper Dnieper	Boyarka	314	50.3137	30.2757		2	15	17
Upper Dnieper	Malutyanka	315	50.3122	30.2427		5	5	10
Upper Dnieper	Lisnyky-1	316	50.307	30.5592	87	4	1	92
Upper Dnieper	Kyiv (Olgin)	317	50.3047	30.6269			20	20
Upper Dnieper	Koncha-Zaspa	318	50.3036	30.5866		2	10	12
Upper Dnieper	Kalnuchi-2	319	50.3021	30.6907			20	20
Upper Dnieper	Stav-Slobidka	320	50.2935	28.7299	20			20
Upper Dnieper	Kremenishche	321	50.2881	30.4845		2	10	12
Upper Dnieper	Vyshenky-1	322	50.2859	30.6916			20	20
Upper Dnieper	Lisnyky-2	323	50.2763	30.5619		5	10	15
Upper Dnieper	Kocheriv-2	324	50.2745	28.6675	20			20
Upper Dnieper	Vyshenky-2	325	50.2743	30.6691			20	20
Upper Dnieper	Dzvonkove	326	50.2741	30.0513			20	20
Upper Dnieper	Yagotyn-1	327	50.2458	31.7795		5	20	25
Upper Dnieper	Yagotyn-2	328	50.2445	31.7592			20	20
Upper Dnieper	Tsarevka-2	329	50.239	28.679	20			20
Upper Dnieper	Protsyv	330	50.2387	30.7421			20	20
Upper Dnieper	Veselinivka	331	50.236	31.2694			20	20
Upper Dnieper	Voronkov	332	50.2169	30.8983			20	20
Upper Dnieper	Pavlivka	333	50.2131	30.7717			20	20
Upper Dnieper	Vyshneve	334	50.2125	28.3598	20			20
Upper Dnieper	Nechiporivka-1	335	50.21	31.79			20	20
Upper Dnieper	Nechiporivka-2	336	50.2069	31.7957			20	20
Upper Dnieper	Korchak-1	337	50.2061	28.4716	20			20
Upper Dnieper	Kosha	338	50.2004	28.3792	20			20
Upper Dnieper	Kyiv (Kozynka)	339	50.2	30.68	1	2	10	0
Upper Dnieper	Dibrovka	340	50.1983	30.2014	3	5		8
Upper Dnieper	Rudenka	341	50.1977	28.2967	20			20
Upper Dnieper	Granitne	342	50.1943	28.6518		5	15	20
Upper Dnieper	Piskivka-1	343	50.1862	28.2734		2	10	12
Upper Dnieper	Piskivka-2	344	50.1767	28.3319		1	22	23
Upper Dnieper	Korostyshev	345	50.1706	29.2904		3	5	8
Upper Dnieper	Zhytomyr	346	50.1703	28.6547		2	19	21
Upper Dnieper	Tatsenky-1	347	50.1674	30.6647		5	20	25
Upper Dnieper	Tatsenky-2	348	50.1632	30.6497	5	5	5	15
Upper Dnieper	Tatsenky-3	349	50.156	30.6742		5	10	15
Upper Dnieper	Denyshy	350	50.1522	28.3333		5	10	15
Upper Dnieper	Kyilov	351	50.1516	30.8747			20	20
Upper Dnieper	Ukrainka-1	352	50.1489	30.7302			20	20
Upper Dnieper	Ukrainka-2	353	50.1465	30.713	20			20
Upper Dnieper	Pogreby	354	50.1457	30.4214		5	10	15
Upper Dnieper	Ukrainka -3	355	50.1415	30.7018		5	10	15
Upper Dnieper	Motovylivka	356	50.1415	30.0574		5	15	20
Upper Dnieper	Trypilia	357	50.1265	30.7678			20	20
Upper Dnieper	Halep'ye	358	50.1215	30.8253		2	8	10
Upper Dnieper	Korchak-2	359	50.12	28.3869		5	20	25
Upper Dnieper	Rudnja-Pochta	360	50.1179	28.3857		2	15	17
Upper Dnieper	Gusentsi-Stare	361	50.1162	30.9638	2	4	10	16
Upper Dnieper	Pryazhev	362	50.115	28.5305		2	20	22
Upper Dnieper	Ercovtsi	363	50.1114	31.2594			20	20
Upper Dnieper	Kalne	364	50.0803	30.9706			20	20
Upper Dnieper	Krasnoye	365	50.0764	30.6637			20	20
Upper Dnieper	Stayky	366	50.076	30.8602			20	20
Upper Dnieper	Zchukovtsy	367	50.0629	30.7702		2	10	12
Upper Dnieper	Perejasliv-1	368	50.0319	31.412			20	20
Upper Dnieper	Perejasliv-2	369	50.0107	31.4513	2	5	3	10
Upper Dnieper	Divichky	370	50.0094	31.0865			20	20
Upper Dnieper	Vysoka Pich	371	49.9982	28.3217		5	20	25
Upper Dnieper	Rzhychyv	372	49.9778	31.0984		2	15	17
Upper Dnieper	Balyko-Shchuchynka	373	49.9547	31.1515			20	20
Upper Dnieper	Chodoriv	374	49.9311	31.249		2	10	12
Upper Dnieper	Pyi	375	49.8866	31.0969			20	20
Middle Dnieper	Sudzha	376	51.1769	35.2786			20	20
Middle Dnieper	Sumy-1	377	50.9191	34.8525			20	20
Middle Dnieper	Sumy-2	378	50.8977	34.8042			20	20
Middle Dnieper	Syrovatka-1	379	50.8333	34.9512	5	3	2	10
Middle Dnieper	Syrovatka-2	380	50.7511	34.8942			20	20
Middle Dnieper	Romny-2	381	50.7439	33.5035			20	20
Middle Dnieper	Myhaylivka	382	50.6627	34.4387			20	20
Middle Dnieper	Rudivka	383	50.5792	32.1489			20	20
Middle Dnieper	Orzhytsia	384	50.4454	31.9265			20	20
Middle Dnieper	Sergiyivka	385	50.4389	32.0271			20	20
Middle Dnieper	Bobryk	386	50.4323	34.2389			20	20
Middle Dnieper	Klymentove	387	50.3809	34.9265		2	9	11
Middle Dnieper	Leliaky	388	50.3329	32.4974	5	4		9
Middle Dnieper	Ruchki	389	50.327	33.7387			20	20
Middle Dnieper	Pyriatyn	390	50.2361	32.5028	23	8		31
Middle Dnieper	Ostapivka	391	50.2267	33.6645			20	20
Middle Dnieper	Raschivka	392	50.2196	33.8986			20	20
Middle Dnieper	Zuyevchi	393	50.1866	33.7498			20	20
Middle Dnieper	Velyka Krucha	394	50.1836	32.5731	25	4		29
Middle Dnieper	Komyshnya-1	395	50.1703	33.6529			20	20
Middle Dnieper	Duhove	396	50.1599	32.7448	20			20
Middle Dnieper	Komyshnya-2	397	50.1568	33.6796	20			20
Middle Dnieper	Duhove	398	50.1565	32.7378	20			20
Middle Dnieper	Komyshnya-3	399	50.1548	33.6837	20			20
Middle Dnieper	Guty	400	50.1448	35.3559			20	20
Middle Dnieper	Cherevky-1	401	50.1428	33.7005			20	20
Middle Dnieper	Gremjachna	402	50.1303	33.6155			20	20
Middle Dnieper	Cherevky-2	403	50.1255	33.7058		5	20	25
Middle Dnieper	Stepanivka	404	50.1228	32.246	54	13		67
Middle Dnieper	Gorodniye	405	50.1123	35.232			20	20
Middle Dnieper	Popovka	406	50.0818	33.5969			20	20
Middle Dnieper	Sorokiv-1	407	50.0687	35.2304	20			20
Middle Dnieper	Sorokiv-2	408	50.0581	35.2032	20			20
Middle Dnieper	Sorokiv-3	409	50.0577	35.2207	20			20
Middle Dnieper	Murafa	410	50.0562	35.2924			20	20
Middle Dnieper	Sorokiv-4	411	50.0562	35.1974	20			20
Middle Dnieper	Krasnokutsk-1	412	50.0561	35.1492	55	8		63
Middle Dnieper	Krasnokutsk-2	413	50.0546	35.1768			20	20
Middle Dnieper	Pereyaslav	414	50.0488	31.492			20	20
Middle Dnieper	Pesky	415	50.0212	33.0761			20	20
Middle Dnieper	Trudolubiv	416	49.994	33.5525			20	20
Middle Dnieper	Trylisy	417	49.9907	29.8299			20	20
Middle Dnieper	Trachtemiriv	418	49.9864	31.3385			20	20
Middle Dnieper	Merla	419	49.986	34.9716		1	11	12
Middle Dnieper	Myrhorod-1	420	49.9855	33.6281		2	15	17
Middle Dnieper	Kovalіvka	421	49.9854	29.9924			20	20
Middle Dnieper	Lubny	422	49.9748	33.0145			20	20
Middle Dnieper	Zubrivka	423	49.9732	34.9854			20	20
Middle Dnieper	Koganka	424	49.9694	29.7823			20	20
Middle Dnieper	Mirhorod-2	425	49.9668	33.5995			20	20
Middle Dnieper	Baranіvka-1	426	49.9627	33.982		2	5	7
Middle Dnieper	Baranіvka-2	427	49.9602	33.9913			20	20
Middle Dnieper	Opishnia-1	428	49.9334	34.6592			20	20
Middle Dnieper	Ryabokoniv	429	49.9326	34.9826			20	20
Middle Dnieper	Brovky	430	49.9321	29.1993	15	9		24
Middle Dnieper	Opishnia-2	431	49.9311	34.6497		2	10	12
Middle Dnieper	Grygorivka	432	49.9307	31.4185		2	10	12
Middle Dnieper	Losyatyn	433	49.908	30.2594		2	10	12
Middle Dnieper	Shyshaky	434	49.8832	33.9876			20	20
Middle Dnieper	Buchak-1	435	49.8731	31.4314		5	15	20
Middle Dnieper	Kagarlyk	436	49.8638	30.8357			20	20
Middle Dnieper	Buchak-2	437	49.8623	31.4394		2	10	12
Middle Dnieper	Krasnolissya	438	49.8613	29.8046			20	20
Middle Dnieper	Trachtemyriv-3	439	49.8582	31.4246	2	15	36	53
Middle Dnieper	Stavy	440	49.8511	30.6817			20	20
Middle Dnieper	Kolomak	441	49.843	35.2862			20	20
Middle Dnieper	Chernorudka -2	442	49.8422	29.0588			20	20
Middle Dnieper	Buky	443	49.8383	29.6593			20	20
Middle Dnieper	Valky	444	49.8368	35.5887			20	20
Middle Dnieper	Chubintsy	445	49.8284	29.6807			20	20
Middle Dnieper	Uzyn-1	446	49.8147	30.4299	14	9	3	26
Middle Dnieper	Orgitsa	447	49.8082	32.7014			20	20
Middle Dnieper	Zaprudie	448	49.8082	30.6497			20	20
Middle Dnieper	Bila Tserkva-1	449	49.8069	30.0608			20	20
Middle Dnieper	Rotok-1	450	49.802	30.1648		2	10	12
Middle Dnieper	Bobrytsya	451	49.792	31.413			20	20
Middle Dnieper	Kaniv-1	452	49.7813	31.493			20	20
Middle Dnieper	Velyka Bogachka	453	49.7787	33.74			20	20
Middle Dnieper	Rotok-2	454	49.7756	30.1457			20	20
Middle Dnieper	Myhaylivka	455	49.7738	34.6218	5	5	15	25
Middle Dnieper	Mala Popivka	456	49.7645	33.3373	10	2		12
Middle Dnieper	Trushky	457	49.7634	29.9472			20	20
Middle Dnieper	Kaniv-2	458	49.7596	31.4974		3	15	18
Middle Dnieper	Kaniv-3	459	49.7596	31.4974		2	15	17
Middle Dnieper	Shkarivka	460	49.7458	30.1879			20	20
Middle Dnieper	Kaniv-4	461	49.7388	31.5292		18	12	30
Middle Dnieper	Kaniv-5	462	49.734	31.4803	2	5	15	22
Middle Dnieper	Nova Rudnia	463	49.7274	28.6814		3	20	23
Middle Dnieper	Stepantsy	464	49.7104	31.2791			20	20
Middle Dnieper	Lugove	465	49.7052	33.7601			20	20
Middle Dnieper	Rakitne	466	49.6837	30.4665			20	20
Middle Dnieper	Chmelnaya	467	49.6765	31.5595		3	56	59
Middle Dnieper	Krasnogorivka	468	49.6719	33.76			20	20
Middle Dnieper	Myronivka	469	49.6692	30.981			20	20
Middle Dnieper	Michaylivka	470	49.6497	31.5227			20	20
Middle Dnieper	Hreshchatyk	471	49.6325	31.6049			20	20
Middle Dnieper	Chapayvka	472	49.5613	32.081	11	1	11	23
Middle Dnieper	Ivanivka	473	49.5606	31.1234		2	10	12
Middle Dnieper	Lozovyk-1	474	49.5531	31.8355		5	15	20
Middle Dnieper	Lozovyk-2	475	49.5497	31.8434			20	20
Middle Dnieper	Lyashchivka-1	476	49.5466	32.6933			20	20
Middle Dnieper	Boguslav	477	49.5448	30.8658			20	20
Middle Dnieper	Gora	478	49.5368	34.5852			20	20
Middle Dnieper	Dybyntsy	479	49.5339	30.7685			20	20
Middle Dnieper	Tetievka	480	49.5333	30.9381			20	20
Middle Dnieper	Volodarka	481	49.5106	29.9118			20	20
Middle Dnieper	Procenky	482	49.508	32.85	12	9	8	29
Middle Dnieper	Bievtsy	483	49.4976	30.9946		5	20	25
Middle Dnieper	Cherkasy	484	49.4806	31.9943			20	20
Middle Dnieper	Lipove	485	49.4721	32.7392			20	20
Middle Dnieper	Bugayvka	486	49.4338	32.9224			20	20
Middle Dnieper	Tetiev	487	49.3855	29.6705			20	20
Middle Dnieper	Chervona Sloboda	488	49.3767	32.21	1	2	23	26
Middle Dnieper	Piatygory	489	49.327	29.9189			20	20
Middle Dnieper	Dibrovka	490	49.3116	29.7811			20	20
Middle Dnieper	Shevchenkivo	491	49.2039	31.1524		2	10	12
Middle Dnieper	Zachepilivka	492	49.2	35.25	9	55	6	70
Middle Dnieper	Kobelyaky	493	49.1449	34.2105			20	20
Middle Dnieper	Kremenchuk-1	494	49.0835	33.3238			20	20
Middle Dnieper	Kremenchuk-2	495	49.0773	33.3365			20	20
Middle Dnieper	Komsomolsk-3	496	49.0667	33.591		3	17	20
Middle Dnieper	Stetsivka	497	49.0661	32.8019			20	20
Middle Dnieper	Andrusivka	498	49.0645	32.9194			20	20
Middle Dnieper	Svitlovodsk-1	499	49.0614	33.2828		5	15	20
Middle Dnieper	Kremenchuk-3	500	49.0579	33.3133			20	20
Middle Dnieper	Svitlovodsk-1	501	49.0508	33.3034		2	10	12
Middle Dnieper	Kremenchuk-1	502	49.0462	33.4972			20	20
Middle Dnieper	Svitlovodsk-2	503	49.0394	33.1428			20	20
Middle Dnieper	Dzerzhynske-1	504	49.0378	33.5537			20	20
Middle Dnieper	Zolotnyshyno	505	49.0246	33.5816			20	20
Middle Dnieper	Dzerzhynske-2	506	49.0225	33.5716			20	20
Middle Dnieper	Svitlovodsk-2	507	49.0024	33.1159			20	20
Middle Dnieper	Komsomolsk-4	508	48.9999	33.6354			20	20
Middle Dnieper	Orelka	509	48.9942	36.0404			20	20
Middle Dnieper	Svitlovodsk -3	510	48.9857	33.1524			20	20
Middle Dnieper	Luchky	511	48.9846	34.1583			20	20
Middle Dnieper	Shevchenky	512	48.897	34.1355			20	20
Middle Dnieper	Kyshenky	513	48.8948	34.1103			20	20
Middle Dnieper	Bilovody	514	48.8672	34.1183			20	20
Middle Dnieper	Orlyk-1	515	48.8488	34.1792			20	20
Middle Dnieper	Orlyk-2	516	48.8349	34.2263			20	20
Middle Dnieper	Radjanske-1	517	48.7753	34.254			20	20
Middle Dnieper	Radjanske-2	518	48.7505	34.2983			20	20
Middle Dnieper	Bulachivka	519	48.6396	35.6681	6	1	20	27
Middle Dnieper	Voronov	520	48.254	35.2226			20	20
Lower Dnieper	Zaporizhzhia-1	521	47.8971	35.1697			20	20
Lower Dnieper	Zaporizhzhia-2	522	47.8132	35.1423			20	20
Lower Dnieper	Zaporizhzhia-3	523	47.7625	35.121			20	20
Lower Dnieper	Novoalexadrivka	524	47.7484	35.3958			20	20
Lower Dnieper	Prymorske	525	47.6365	35.2771			20	20
Lower Dnieper	Orechiv	526	47.5814	35.7867			20	20
Lower Dnieper	Energodar	527	47.4728	34.6758			20	20
Lower Dnieper	Proletariy	528	47.3292	34.1541			20	20
Lower Dnieper	Bila Krynytsia	529	47.3238	33.2373			20	20
Lower Dnieper	Snigіrіvka-1	530	47.0846	32.8281			20	20
Lower Dnieper	Snigіrіvka-2	531	47.0264	32.8148			20	20
Lower Dnieper	Novokayry-1	532	47.0116	33.58			20	20
Lower Dnieper	Kayry	533	46.9092	33.7134			20	20
Lower Dnieper	Vesele	534	46.8175	33.3343		5	10	15
Lower Dnieper	Dariyivka	535	46.7437	32.8121			20	20
Lower Dnieper	Antonivka	536	46.6689	32.6954		19	20	39
Lower Dnieper	Nova Mayachka	537	46.6624	33.1366			20	20
Lower Dnieper	Oleshky-1	538	46.6332	32.7064		3	10	13
Lower Dnieper	Oleshky-2	539	46.6332	32.7064		5	10	15
Lower Dnieper	Oleshky-3	540	46.6053	32.9872		5	10	15
Lower Dnieper	Herson	541	46.5989	32.5727		2	10	12
Lower Dnieper	Oleshky-3	542	46.5879	32.6452			20	20
Lower Dnieper	Oleshky-4	543	46.5879	32.6452			20	20
Lower Dnieper	Nova Maiachka-1	544	46.5824	33.1437		1	10	11
Lower Dnieper	Nova Maiachka-2	545	46.5744	33.0047		2	3	5
Lower Dnieper	Novonatalivka	546	46.5379	33.6717			20	20
Lower Dnieper	Golaja Prystan	547	46.5367	32.5332			20	20
Lower Dnieper	Rybachie	548	46.4793	32.2426		3	24	27
Upper Southern Bug	Chervoniy Step	549	49.5769	28.7107			20	20
Upper Southern Bug	Shyroka Greblya-1	550	49.5189	28.0234			20	20
Upper Southern Bug	Chornyi Ostriv	551	49.4953	26.7814			20	20
Upper Southern Bug	Shyroka Greblya-2	552	49.49	28.25		8	27	35
Upper Southern Bug	Kalynivka-1	553	49.464	28.5257			20	20
Upper Southern Bug	Stavishche	554	49.3874	30.2245			20	20
Upper Southern Bug	Malynivka	555	49.3324	28.1558			20	20
Upper Southern Bug	Varenka	556	49.3105	27.7129			20	20
Upper Southern Bug	Mikulintsy	557	49.2905	28.1539			20	20
Upper Southern Bug	Zhashkiv -1	558	49.2672	30.0991			20	20
Upper Southern Bug	Mikulintsy	559	49.2515	28.157			20	20
Upper Southern Bug	Vinnytsia-1	560	49.2267	28.3823			20	20
Upper Southern Bug	Vinnytsia-2	561	49.218	28.5495			20	20
Upper Southern Bug	Zhashkiv-2	562	49.2162	30.1258			20	20
Upper Southern Bug	Ohmativ	563	49.1612	30.2262			20	20
Upper Southern Bug	Chervonyi Kut	564	49.1509	30.3552			20	20
Upper Southern Bug	Brayiliv	565	49.1129	28.1323			20	20
Upper Southern Bug	Garmaky	566	49.1059	27.5565			20	20
Upper Southern Bug	Zvenigorodka	567	49.0987	30.9453			20	20
Upper Southern Bug	Buky	568	49.0902	30.3969			20	20
Upper Southern Bug	Druzhba	569	49.0706	27.4063			20	20
Upper Southern Bug	Olchovets	570	49.0356	30.8929			20	20
Upper Southern Bug	Sutysky	571	49.0316	28.419			20	20
Upper Southern Bug	Tyvriv	572	49.0227	28.506			20	20
Upper Southern Bug	Mankivka-1	573	48.97	30.3528		5	10	15
Upper Southern Bug	Popuzhintsy	574	48.9609	30.5665			20	20
Upper Southern Bug	Stryl'chyntsi	575	48.9556	28.6795			20	20
Upper Southern Bug	Gorobiyika	576	48.9281	28.6668			20	20
Upper Southern Bug	Talne	577	48.8894	30.7506			20	20
Upper Southern Bug	Ragozna	578	48.8813	28.6586			20	20
Upper Southern Bug	Antonivka	579	48.8455	26.9131			20	20
Upper Southern Bug	Gaysyn	580	48.8254	29.3993			20	20
Upper Southern Bug	Kamenka	581	48.7896	31.7538			20	20
Upper Southern Bug	Oredivka	582	48.7838	29.9793			20	20
Upper Southern Bug	Ladyzhyn	583	48.7048	29.2327			20	20
Upper Southern Bug	Novoarchangelsk	584	48.6865	30.8093			20	20
Upper Southern Bug	Gubnyk	585	48.6158	29.3094			20	20
Upper Southern Bug	Yatran	586	48.5405	30.249			20	20
Upper Southern Bug	Kropyvnytskyi	587	48.4674	32.21			20	20
Upper Southern Bug	Fedorivka-1	588	48.4318	30.8422			20	20
Upper Southern Bug	Zhovty Vody	589	48.3707	33.5224			20	20
Upper Southern Bug	Brytavka	590	48.17	29.1832			20	20
Upper Southern Bug	Lushnevate	591	48.1689	30.4486			20	20
Upper Southern Bug	Krasnen'ke	592	48.1504	30.3288			20	20
Upper Southern Bug	Lupolovo-1	593	48.1455	30.2575			20	20
Upper Southern Bug	Lupolovo-2	594	48.1408	30.28			20	20
Upper Southern Bug	Savran-1	595	48.1309	30.0952		5	10	15
Upper Southern Bug	Pyrozhna	596	48.1298	29.1558			20	20
Lower Southern Bug	Savran-2	597	48.1309	30.0952		5	10	15
Lower Southern Bug	Gayevske	598	48.0674	32.2631			20	20
Lower Southern Bug	Oleksiyivka	599	48.0674	32.2631			20	20
Lower Southern Bug	Migiya	600	48.0319	30.9514			20	20
Lower Southern Bug	Paronіvka	601	48.009	30.7949			20	20
Lower Southern Bug	Kurypchyno-1	602	48.0073	31.013			20	20
Lower Southern Bug	Kurypchyno-2	603	48.0002	30.9909		5	20	25
Lower Southern Bug	Kurypchyno-3	604	48.0002	30.9909		5	20	25
Lower Southern Bug	Kryve Ozero-1	605	47.9775	30.3135			20	20
Lower Southern Bug	Semenivka-1	606	47.9694	31.0375			20	20
Lower Southern Bug	Semenivka-2	607	47.958	31.046			20	20
Lower Southern Bug	Balta	608	47.9513	29.5393			20	20
Lower Southern Bug	Kryiviy Rig	609	47.946	33.2803			20	20
Lower Southern Bug	Kryve Ozero-2	610	47.9342	30.3593			20	20
Lower Southern Bug	Romanova Balka	611	47.9293	30.9963			20	20
Lower Southern Bug	Krymka	612	47.9278	30.778			20	20
Lower Southern Bug	Kunary	613	47.9262	30.6577			20	20
Lower Southern Bug	Antonivka	614	47.9238	30.2652			20	20
Lower Southern Bug	Lukanivka	615	47.915	30.426			20	20
Lower Southern Bug	Ketrisanivka	616	47.9088	32.1746			20	20
Lower Southern Bug	Bobryk	617	47.8969	30.1362			20	20
Lower Southern Bug	Pankratovo-1	618	47.8631	31.1248		1	10	11
Lower Southern Bug	Pankratovo-2	619	47.8631	31.1248		1	10	11
Lower Southern Bug	Bogdanivka	620	47.8234	31.1221			20	20
Lower Southern Bug	Uzhnoukrayinsk	621	47.817	31.1682			20	20
Lower Southern Bug	Rozanivka	622	47.778	32.381			20	20
Lower Southern Bug	Buz'ske	623	47.7472	31.1864			20	20
Lower Southern Bug	Sagaydak	624	47.737	32.3907			20	20
Lower Southern Bug	Trycraty	625	47.7184	31.404			20	20
Lower Southern Bug	Sofiyvka-1	626	47.7131	32.3846			20	20
Lower Southern Bug	Novyi Bug	627	47.7069	32.5309			20	20
Lower Southern Bug	Oleksandrivka	628	47.6875	31.2686			20	20
Lower Southern Bug	Sofiyvka-1	629	47.6831	32.3732			20	20
Lower Southern Bug	Vossiyatske	630	47.6632	32.1162			20	20
Lower Southern Bug	Semenivka-1	631	47.6172	32.1056			20	20
Lower Southern Bug	Semenivka-2	632	47.6014	32.1116			20	20
Lower Southern Bug	Voznesensk	633	47.5676	31.3445			20	20
Lower Southern Bug	Antonivka-1	634	47.5528	32.0335			20	20
Lower Southern Bug	Antinuvka-2	635	47.5395	32.0144			20	20
Lower Southern Bug	Shcherbani-1	636	47.5241	31.7854			20	20
Lower Southern Bug	Antonivka -3	637	47.5228	32.0937			20	20
Lower Southern Bug	Shcherbani -2	638	47.5103	31.7667			20	20
Lower Southern Bug	Pidlisne-1	639	47.4842	31.7449			20	20
Lower Southern Bug	Pidlisne-2	640	47.4671	31.7304			20	20
Lower Southern Bug	Nova Odessa-1	641	47.3338	31.7951			20	20
Lower Southern Bug	Nova Odessa-2	642	47.3282	31.7401			20	20
Lower Southern Bug	Bila Krynytsya	643	47.3238	33.2373			20	20
Lower Southern Bug	Guriyivka	644	47.1134	31.8703			20	20
Lower Southern Bug	Snigirivka-1	645	47.0846	32.8281			20	20
Lower Southern Bug	Snigirivka-2	646	47.0264	32.8148			20	20
Lower Southern Bug	Mykolaiv	647	46.9934	32.0801			20	20
Lower Southern Bug	Dariyivka	648	46.7437	32.8121			20	20
Donetz	Shestakovo	649	50.0621	36.6315			20	20
Sea of Azov coastal rivers	Piatichatky	650	48.3787	33.6451			20	20
Sea of Azov coastal rivers	Fedorivka	651	47.2094	37.109			20	20
Sea of Azov coastal rivers	Astrachanka	652	46.9384	35.5536			20	20
Sea of Azov coastal rivers	Melitopil	653	46.8511	35.3925			20	20
Sea of Azov coastal rivers	Berdyansk	654	46.8124	36.8429			20	20
Sea of Azov coastal rivers	Mordovinka	655	46.751	35.3605			20	20
Sea of Azov coastal rivers	Schelugy	656	46.557	35.2116			20	20
Sea of Azov coastal rivers	Davydivka	657	46.5166	35.117			20	20
Sea of Azov coastal rivers	Askania Nova	658	46.4546	33.8798			20	20
Black Sea costal rivers	Berezivka	659	47.1867	30.9222		7	18	25
Black Sea costal rivers	Tatarbunary	660	45.8495	29.6493			20	20
Black Sea costal rivers	Dyvizia	661	45.9223	29.9833			20	20
Black Sea costal rivers	Prymorske	662	45.9711	30.2931			20	20
Black Sea costal rivers	Skadovsk	663	46.1372	32.8873			20	20
Black Sea costal rivers	Monashy	664	46.1763	30.0478			20	20
Black Sea costal rivers	Grybivka	665	46.2068	30.5584			20	20
Black Sea costal rivers	Dalnik	666	46.2211	30.5349			20	20
Black Sea costal rivers	Bogatyrivka	667	46.2529	30.5189			20	20
Black Sea costal rivers	Baraboy	668	46.2903	30.5058			20	20
Black Sea costal rivers	Velykodolynske-1	669	46.3348	30.596			20	20
Black Sea costal rivers	Velykodolynske-2	670	46.3483	30.5999			20	20
Black Sea costal rivers	Tairovo	671	46.3508	30.644			20	20
Black Sea costal rivers	Suhyi Lyman-1	672	46.384	30.6421			20	20
Black Sea costal rivers	Suhyi Lyman-2	673	46.386	30.636			20	20
Black Sea costal rivers	Velikyi Dalnik-1	674	46.4132	30.6025			20	20
Black Sea costal rivers	Velikyi Dalnik-2	675	46.4471	30.5742			20	20
Black Sea costal rivers	Odessa-1	676	46.4634	30.6925			20	20
Black Sea costal rivers	Odessa-2	677	46.4811	30.7061			20	20
Black Sea costal rivers	Velikyi Dalnik-3	678	46.4851	30.5783			20	20
Black Sea costal rivers	Odessa-3	679	46.5593	30.749			20	20
Black Sea costal rivers	Odessa-4	680	46.6359	31.4895			20	20
Black Sea costal rivers	Vizyrka	681	46.6584	30.9955			20	20
Black Sea costal rivers	Sverdlovo	682	46.6659	30.8815			20	20
Black Sea costal rivers	Otradovo-1	683	46.6776	30.4454			20	20
Black Sea costal rivers	Otradovo-2	684	46.6868	30.4349			20	20
Black Sea costal rivers	Otradovo-3	685	46.6882	30.424			20	20
Black Sea costal rivers	Nova Olshanka	686	46.705	30.9346			20	20
Black Sea costal rivers	Kamenka	687	46.8032	31.6641			20	20
Black Sea costal rivers	Anatolievka	688	46.8057	31.2096			20	20
Black Sea costal rivers	Krasne	689	46.8225	31.4114			20	20
Black Sea costal rivers	Nechayne	690	46.9361	31.5451			20	20
Black Sea costal rivers	Radostne	691	46.9892	30.3294			20	20
Black Sea costal rivers	Chervonoznamenka	692	47.0188	30.2875			20	20
Black Sea costal rivers	Revova	693	47.2655	30.3081			20	20
Black Sea costal rivers	Viktorivka	694	47.4655	30.324			20	20
Black Sea costal rivers	Troitske-1	695	47.6428	30.2601			20	20
Black Sea costal rivers	Troitske-2	696	47.6542	30.2018			20	20
Black Sea costal rivers	Ananiev-1	697	47.7053	30.0683			20	20
Black Sea costal rivers	Ananiev-2	698	47.7147	29.9654			20	20
Black Sea costal rivers	Sichavka	699	46.6361	31.1063			20	20
Black Sea costal rivers	Lubopil	700	46.714	31.1087			20	20
Black Sea costal rivers	Tashyno	701	46.9316	31.1354			20	20
Black Sea costal rivers	Troitske-3	702	47.6285	30.3139			20	20
Black Sea costal rivers	Oleksandrivka	703	47.766	29.6009			20	20
Black Sea costal rivers	Slobodka	704	47.8913	29.3549			20	20
Black Sea costal rivers	Pokrovka	705	46.4813	31.7017			20	20
Black Sea costal rivers	Geroyske	706	46.4972	31.8846			20	20
Black Sea costal rivers	Pokrovka	707	46.5022	31.6433			20	20
Black Sea costal rivers	Vasylivka-1	708	46.5136	31.8279			20	20
Black Sea costal rivers	Vasylivka-2	709	46.5165	31.7869			20	20
Crimea	Vypasne	710	45.8788	34.1597			20	20
Crimea	Dzhankoy	711	45.7344	34.417			20	20
Crimea	Zorkino	712	45.5519	34.6855			20	20
Crimea	Yakovenko	713	45.0663	36.3229			20	20
Crimea	Bilogorsk	714	45.0321	34.5907			20	20
Crimea	Staryi Krym	715	45.0168	35.0665			20	20
Crimea	Sympheropil	716	44.9819	34.0692			20	20
Crimea	Krasnokamianka	717	44.9223	35.0969			20	20
Crimea	Aluschta	718	44.6939	34.3498			20	20
Crimea	Izobil'ne	719	44.6502	34.0309			20	20
Crimea	Vinogradnyi	720	44.6369	34.3537			20	20
Crimea	Siryi Kamen	721	44.5738	34.2987			20	20
Crimea	Gurzuf	722	44.5419	34.2776			20	20
Crimea	Danylivka	723	44.5303	34.2698			20	20
Crimea	Schiroke	724	44.4784	33.7629			20	20
Crimea	Goncharne	725	44.4645	33.7061			20	20
Crimea	Simeiz	726	44.4098	34.0015			20	20
Total					1504	913	13154	15571
